# Supplementary material for: Towards a relationship between photoluminescence emissions and photocatalytic activity of Ag2SeO4: combining experimental data and theoretical insights
Source: Royal Society of Chemistry journal article supplement (doi:10.1039/d2dt01057g), 2022-01-01
Supplement: d2dt01057g1.pdf [file d2dt01057g1.pdf]

Electronic supplementary information for:

**Towards a relationship between photoluminescence emissions and photocatalytic activity of  $\text{Ag}_2\text{SeO}_4$ : Combining experimental data and theoretical insights**

Ivo M. Pinatti <sup>a,b\*</sup>, Ana C. M. Tello <sup>c,d</sup>, Paula F. S. Pereira <sup>c</sup>, Aline B. Trench <sup>c</sup>, Marcio D. Teodoro <sup>e</sup>, Ieda L. V. Rosa <sup>c</sup>, Albérico B. F. da Silva <sup>d</sup>, Elson Longo <sup>c</sup>, Juan Andrés <sup>b\*</sup>, and Alexandre Z. Simões <sup>a</sup>

<sup>a</sup> Faculty of Engineering of Guaratinguetá, São Paulo State University (UNESP), 12516-410, Guaratinguetá, SP, Brazil.

<sup>b</sup> Department of Analytical and Physical Chemistry, University Jaume I (UJI), Castelló 12071, Spain.

<sup>c</sup> CDMF, LIEC, Federal University of São Carlos (UFSCar), P.O. Box 676, São Carlos 13565-590, Brazil.

<sup>d</sup> São Carlos Institute of Chemistry, São Paulo University (USP), P.O. Box 676, São Carlos 13566-905, Brazil.

<sup>e</sup> Physics Department, Federal University of São Carlos (UFSCar), P.O. Box 676, São Carlos 13565-905, Brazil.

\*corresponding authors: [ivo.m.pinatti@unesp.br](mailto:ivo.m.pinatti@unesp.br); [andres@gfa.uji.es](mailto:andres@gfa.uji.es)

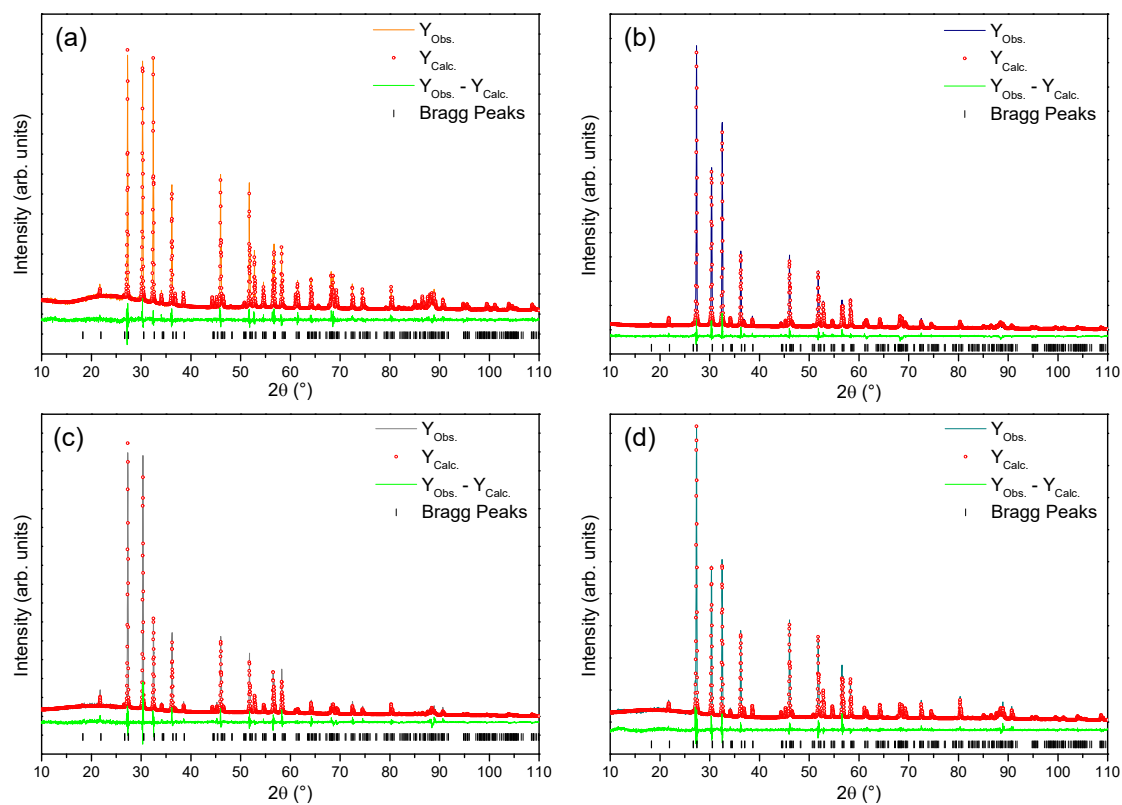

**Figure SI-1.** Rietveld refinement plot of (a)  $\text{Ag}_2\text{SeO}_4$ -SC, (b)  $\text{Ag}_2\text{SeO}_4$ -UP, (c)  $\text{Ag}_2\text{SeO}_4$ -CP and (d)  $\text{Ag}_2\text{SeO}_4$ -MH microcrystals.

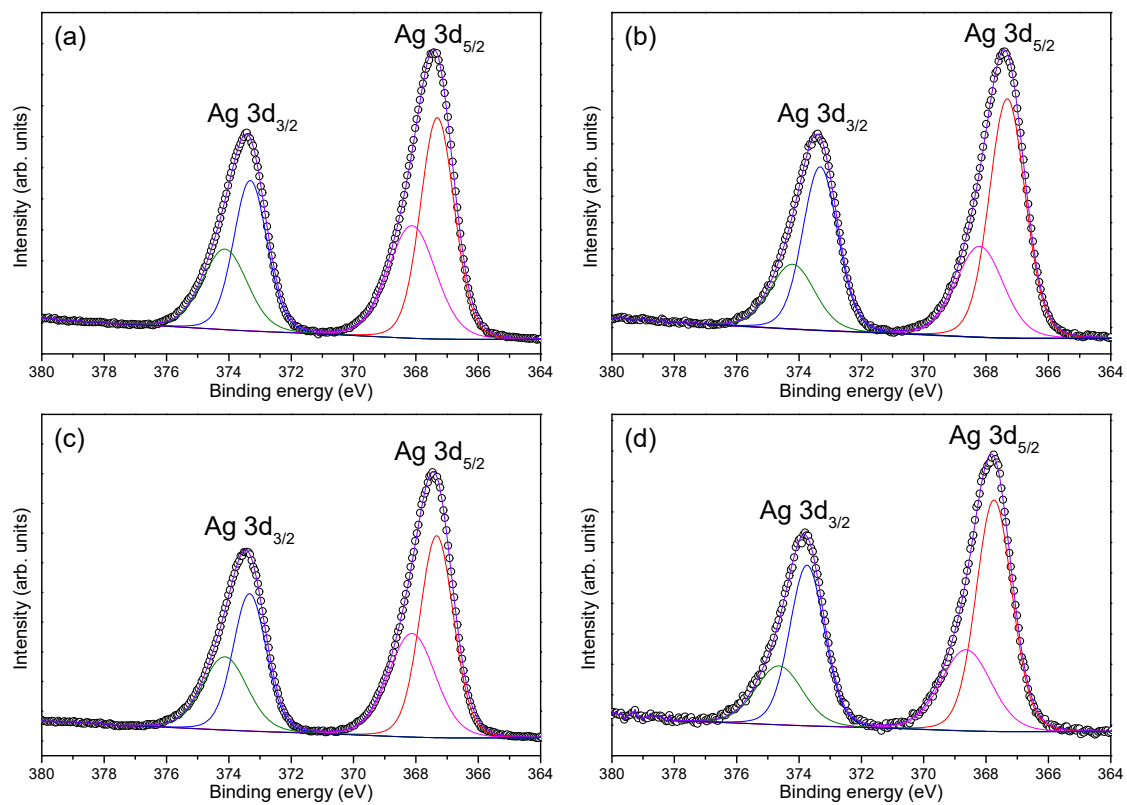

**Figure SI-2.** Core level spectra of Ag 3d of the (a) Ag<sub>2</sub>SeO<sub>4</sub>-SC, (b) Ag<sub>2</sub>SeO<sub>4</sub>-UP, (c) Ag<sub>2</sub>SeO<sub>4</sub>-CP, and (d) Ag<sub>2</sub>SeO<sub>4</sub>-MH samples.

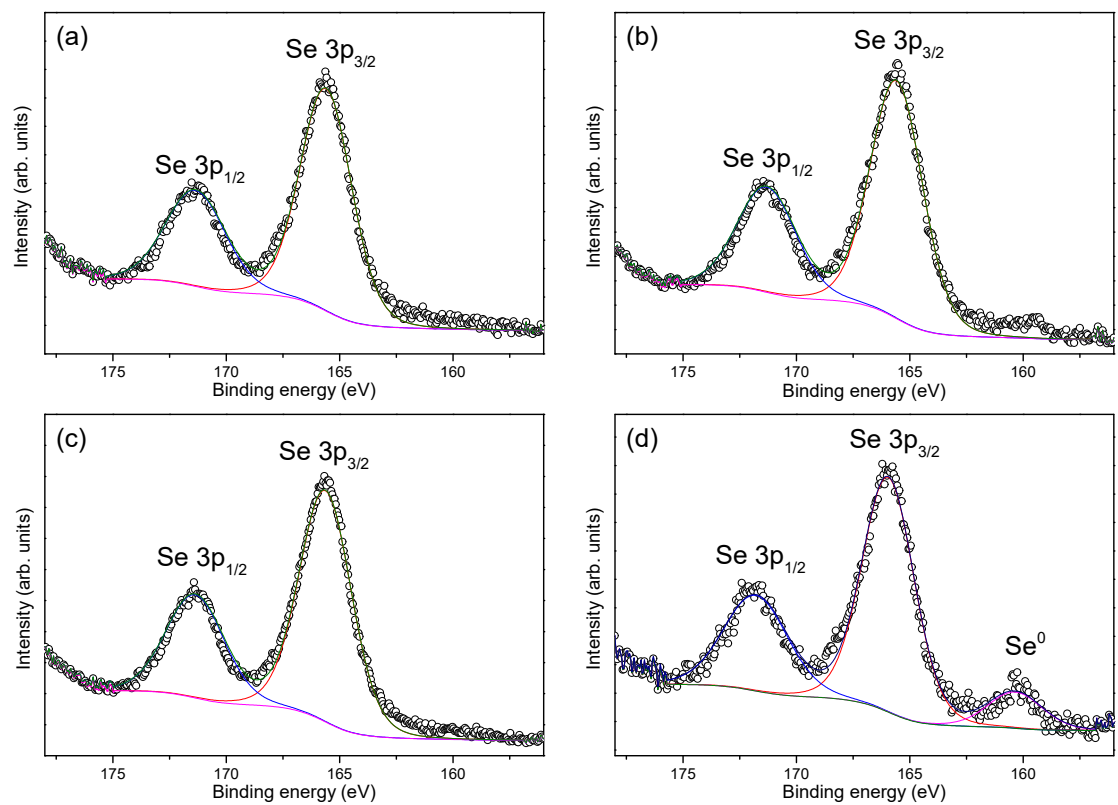

**Figure SI-3.** Core level spectra of Se 3p of the (a) Ag<sub>2</sub>SeO<sub>4</sub>-SC, (b) Ag<sub>2</sub>SeO<sub>4</sub>-UP, (c) Ag<sub>2</sub>SeO<sub>4</sub>-CP, and (d) Ag<sub>2</sub>SeO<sub>4</sub>-MH samples.

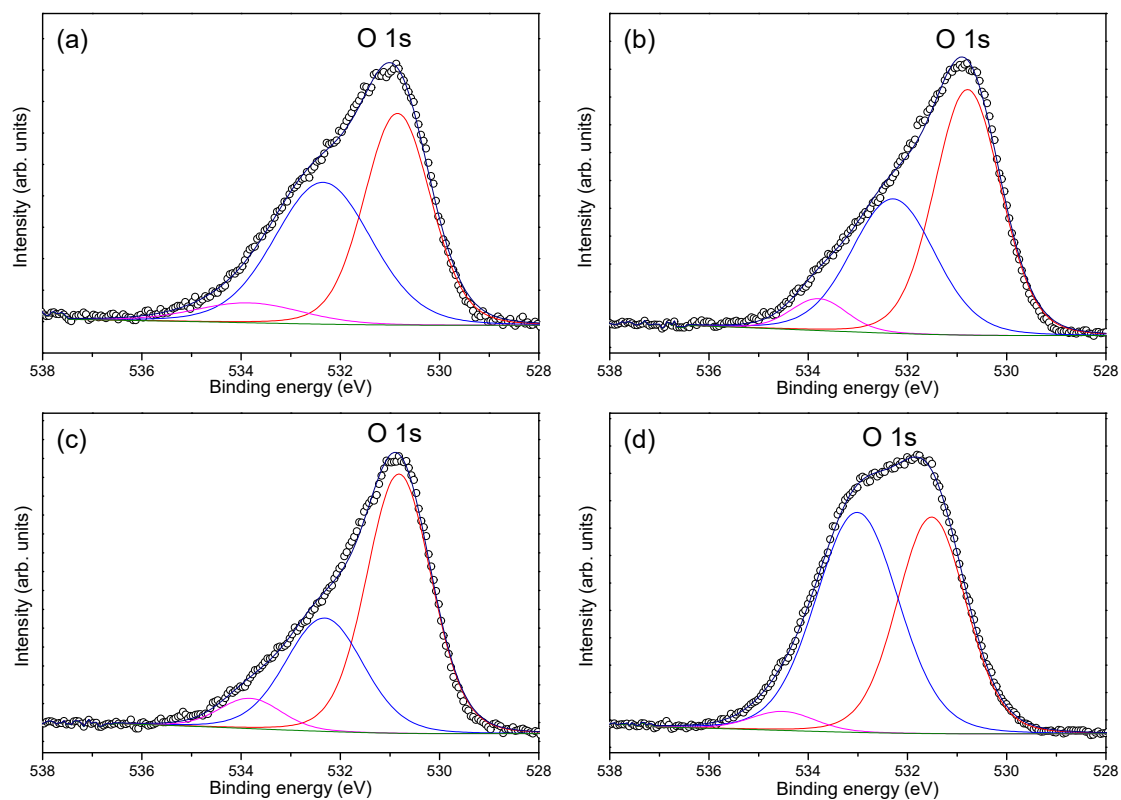

**Figure SI-4.** Core level spectra of O 1s of the (a) Ag<sub>2</sub>SeO<sub>4</sub>-SC, (b) Ag<sub>2</sub>SeO<sub>4</sub>-UP, (c) Ag<sub>2</sub>SeO<sub>4</sub>-CP, and (d) Ag<sub>2</sub>SeO<sub>4</sub>-MH samples.

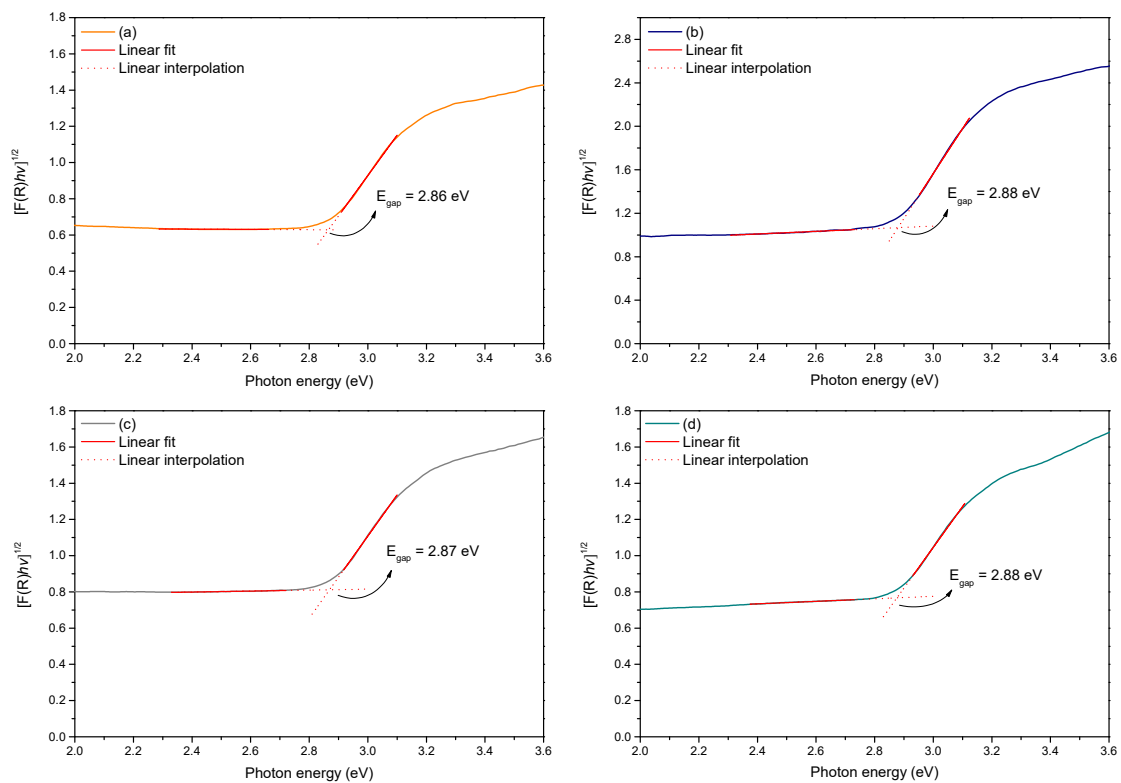

**Figure SI-5.** Band gap energy for the (a)  $\text{Ag}_2\text{SeO}_4\text{-SC}$ , (b)  $\text{Ag}_2\text{SeO}_4\text{-UP}$ , (c)  $\text{Ag}_2\text{SeO}_4\text{-CP}$ , and (d)  $\text{Ag}_2\text{SeO}_4\text{-MH}$  samples.

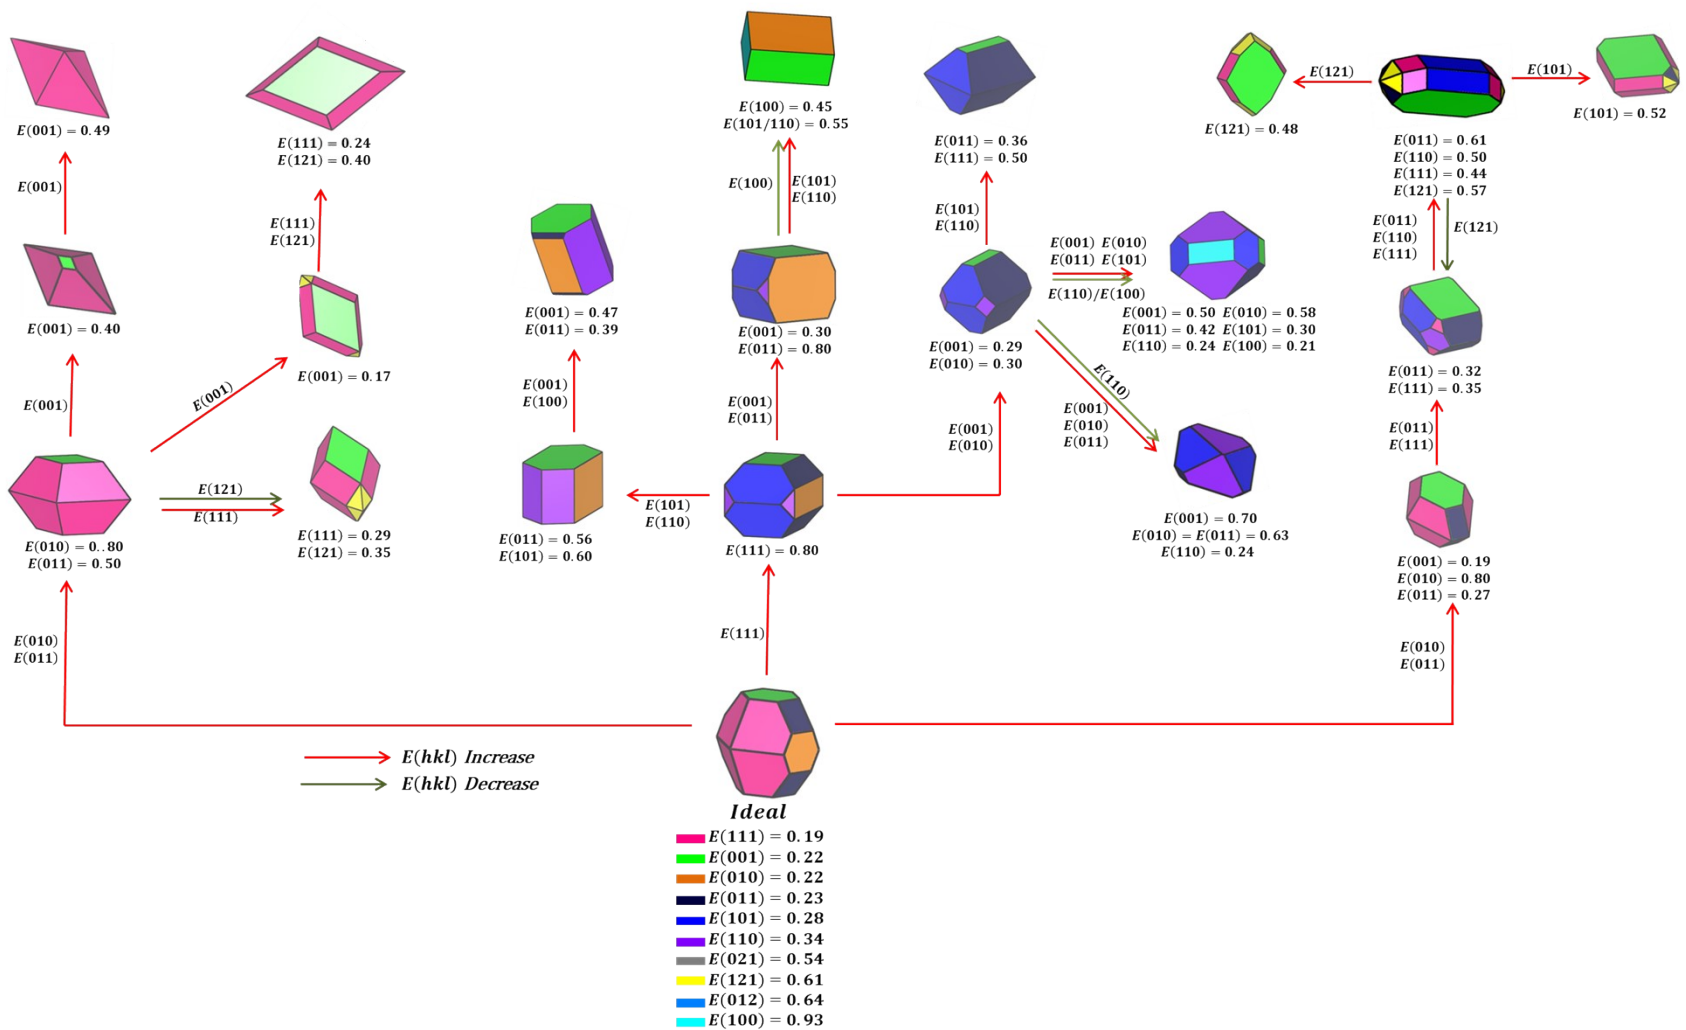

**Figure SI-6.** Crystals shape theoretically modeled by the Wulff construction and their energy relative surface for  $\text{Ag}_2\text{SeO}_4$ .  $E(hkl)$  in  $\text{Jm}^{-2}$ .

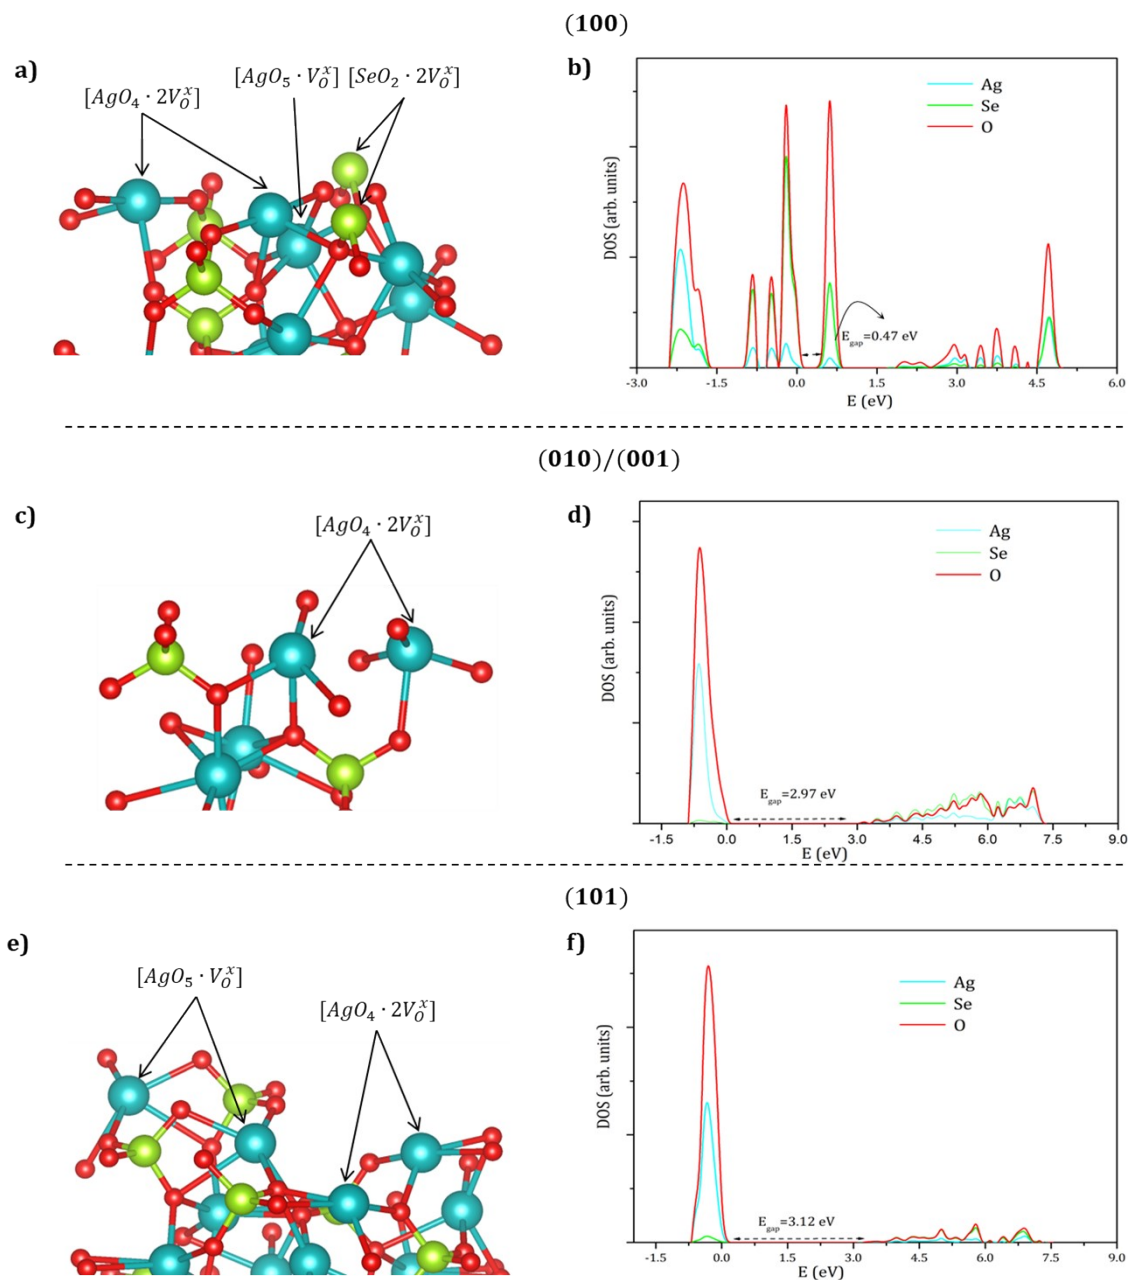

**Figure SI-7.** Geometric structure and DOS of surface atoms in the relaxed surface slab: (a-b) (100) surface, (c-d) (010)/001 surfaces, and (e-f) (101) surface



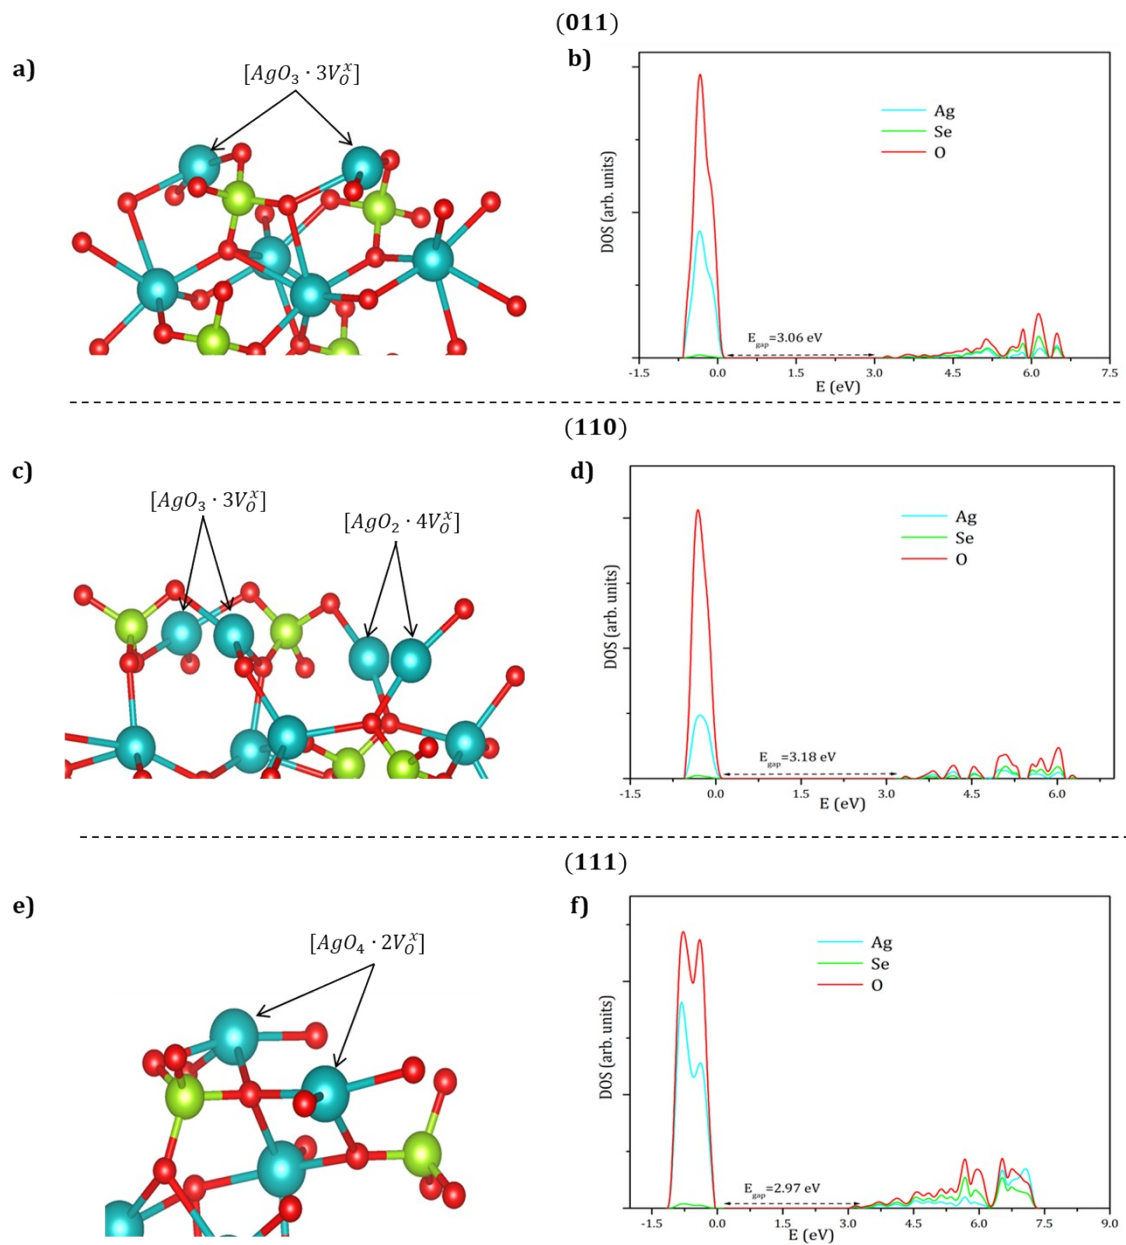

**Figure SI-8.** Geometric structure and DOS of surface atoms in the relaxed surface slab: (a-b) (011) surface, (c-d) (110) surface, and (e-f) (111) surface

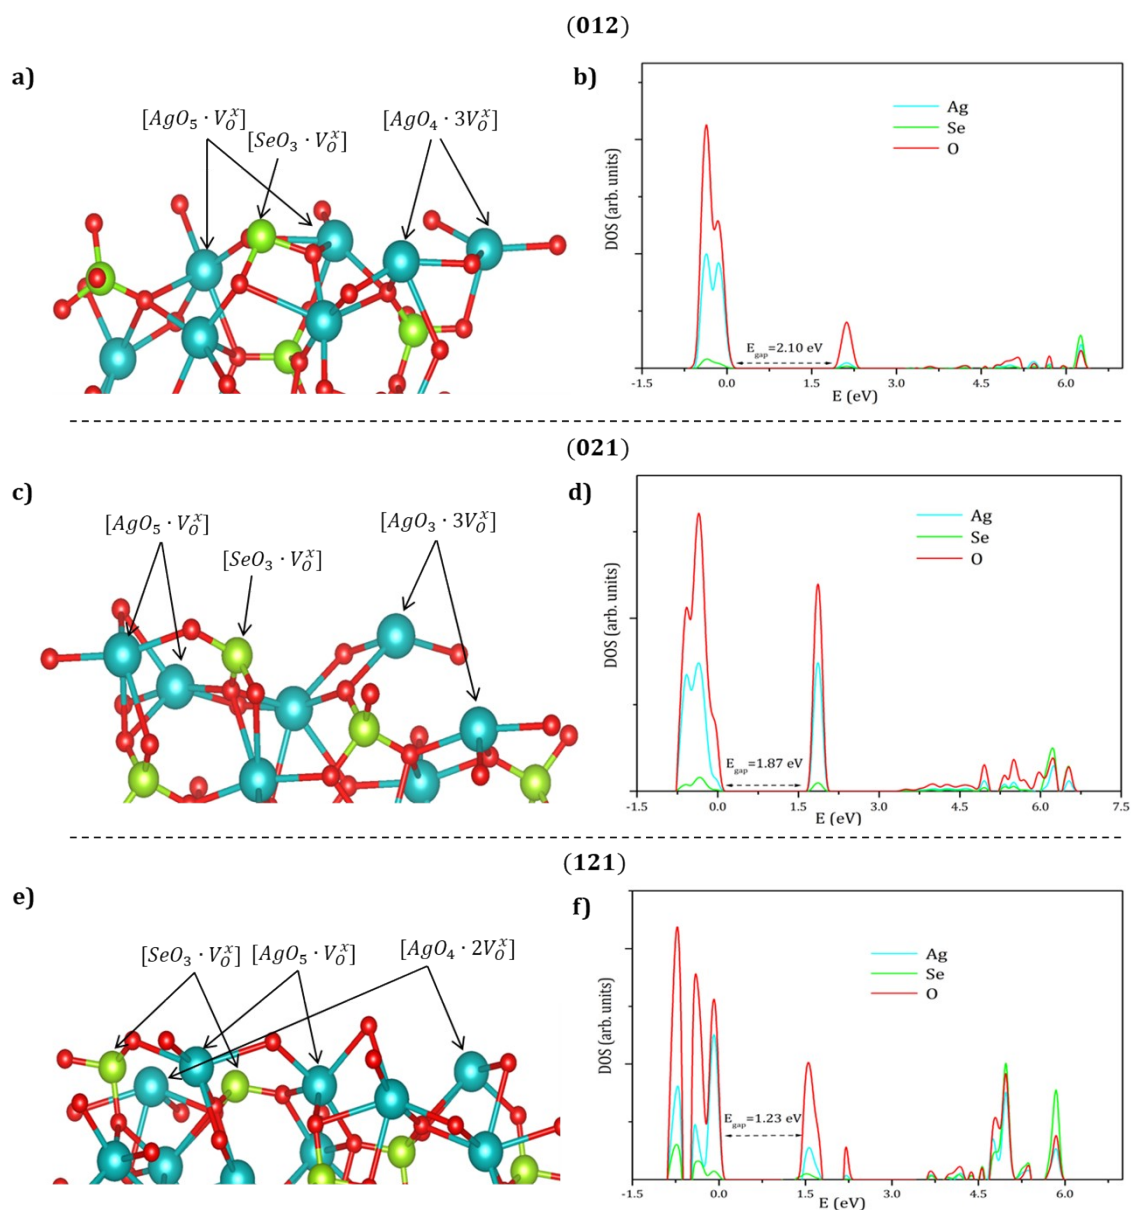

**Figure SI-9.** Geometric structure and DOS of surface atoms in the relaxed surface slab: (a-b) (012) surface, (c-d) (021) surface, and (e-f) (121) surface

**Table SI-1.** 2D lattice parameters of surface primitive cell, Area of surface in nm<sup>2</sup>, number of bulk units ( $n$ ) used in the slab construction and number of layers in the optimized slab.

| Surface | 2D Lattice parameter                                                         | Area  | $n$ | layers |
|---------|------------------------------------------------------------------------------|-------|-----|--------|
| (100)   | $a = 8.483 \text{ \AA}$ $b = 8.062 \text{ \AA}$<br>$\gamma = 95.247^\circ$   | 0.709 | 4   | 24     |
| (010)   | $a = 6.190 \text{ \AA}$ $b = 7.057 \text{ \AA}$<br>$\gamma = 116.014^\circ$  | 0.393 | 3.5 | 35     |
| (001)   | $a = 6.039 \text{ \AA}$ $b = 6.089 \text{ \AA}$<br>$\gamma = 119.731^\circ$  | 0.335 | 3.5 | 21     |
| (101)   | $a = 7.041 \text{ \AA}$ $b = 11.146 \text{ \AA}$<br>$\gamma = 90^\circ$      | 0.784 | 5   | 25     |
| (011)   | $a = 6.076 \text{ \AA}$ $b = 8.678 \text{ \AA}$<br>$\gamma = 90^\circ$       | 0.521 | 4   | 28     |
| (110)   | $a = 6.522 \text{ \AA}$ $b = 12.543 \text{ \AA}$<br>$\gamma = 90^\circ$      | 0.813 | 6   | 42     |
| (111)   | $a = 6.219 \text{ \AA}$ $b = 7.112 \text{ \AA}$<br>$\gamma = 100.722^\circ$  | 0.440 | 3   | 42     |
| (012)   | $a = 6.057 \text{ \AA}$ $b = 12.851 \text{ \AA}$<br>$\gamma = 103.887^\circ$ | 0.780 | 5   | 70     |
| (021)   | $a = 6.198 \text{ \AA}$ $b = 13.802 \text{ \AA}$<br>$\gamma = 99.904^\circ$  | 0.864 | 4   | 56     |
| (121)   | $a = 6.819 \text{ \AA}$ $b = 15.477 \text{ \AA}$<br>$\gamma = 95.345^\circ$  | 0.112 | 5   | 55     |

**Table SI-2.** Atomic positions of the  $\text{Ag}_2\text{SeO}_4$  microcrystals.

| Atoms      | $\text{Ag}_2\text{SeO}_4\text{-SC}$ |        |        | $\text{Ag}_2\text{SeO}_4\text{-UP}$ |        |        |
|------------|-------------------------------------|--------|--------|-------------------------------------|--------|--------|
|            | x                                   | y      | z      | x                                   | y      | z      |
| <b>Ag1</b> | 0.1250                              | 0.4475 | 0.1250 | 0.1250                              | 0.4475 | 0.1250 |
| <b>Se1</b> | 0.1250                              | 0.1250 | 0.1250 | 0.1250                              | 0.1250 | 0.1250 |
| <b>O1</b>  | 0.2725                              | 0.0281 | 0.0468 | 0.2995                              | 0.0321 | 0.0416 |

  

| Atoms      | $\text{Ag}_2\text{SeO}_4\text{-CP}$ |        |        | $\text{Ag}_2\text{SeO}_4\text{-MH}$ |        |        |
|------------|-------------------------------------|--------|--------|-------------------------------------|--------|--------|
|            | x                                   | y      | z      | x                                   | y      | z      |
| <b>Ag1</b> | 0.1250                              | 0.4475 | 0.1250 | 0.1250                              | 0.4475 | 0.1250 |
| <b>Se1</b> | 0.1250                              | 0.1250 | 0.1250 | 0.1250                              | 0.1250 | 0.1250 |
| <b>O1</b>  | 0.2450                              | 0.0652 | 0.0196 | 0.2634                              | 0.0251 | 0.0413 |

**Table SI-3.** Crystallographic data of Rietveld refinement.

| Parameters                 | Samples                              |                                      |                                      |                                      |
|----------------------------|--------------------------------------|--------------------------------------|--------------------------------------|--------------------------------------|
|                            | Ag <sub>2</sub> SeO <sub>4</sub> -SC | Ag <sub>2</sub> SeO <sub>4</sub> -UP | Ag <sub>2</sub> SeO <sub>4</sub> -CP | Ag <sub>2</sub> SeO <sub>4</sub> -MH |
| Source                     | Cu K $\alpha$                        | Cu K $\alpha$                        | Cu K $\alpha$                        | Cu K $\alpha$                        |
| Chemical formula           | Ag <sub>2</sub> SeO <sub>4</sub>     |
| Formula weight             | 358.69                               | 358.69                               | 358.69                               | 358.69                               |
| Temperature                | ambient                              | ambient                              | ambient                              | ambient                              |
| Pressure                   | ambient                              | ambient                              | ambient                              | ambient                              |
| Wavelength (Å)             | 1.5406                               | 1.5406                               | 1.5406                               | 1.5406                               |
| Crystal system             | orthorhombic                         | orthorhombic                         | orthorhombic                         | orthorhombic                         |
| Space group (No.)          | <i>Fddd</i>                          | <i>Fddd</i>                          | <i>Fddd</i>                          | <i>Fddd</i>                          |
| <i>a</i> (Å)               | 6.05142(7)                           | 6.05279(10)                          | 6.05335(17)                          | 6.05196(10)                          |
| <i>b</i> (Å)               | 10.39899(16)                         | 10.40138(24)                         | 10.39740(25)                         | 10.39745(23)                         |
| <i>c</i> (Å)               | 12.98369(11)                         | 12.98497(16)                         | 12.98864(18)                         | 12.98219(13)                         |
| $\alpha$ (°)               | 90.0                                 | 90.0                                 | 90.0                                 | 90.0                                 |
| $\beta$ (°)                | 90.0                                 | 90.0                                 | 90.0                                 | 90.0                                 |
| $\gamma$ (°)               | 90.0                                 | 90.0                                 | 90.0                                 | 90.0                                 |
| <i>V</i> (Å <sup>3</sup> ) | 817.047(16)                          | 817.499(26)                          | 817.493(32)                          | 816.903(24)                          |
| <i>Z</i>                   | 8                                    | 8                                    | 8                                    | 8                                    |
| <i>d</i> -space range (Å)  | 0.94-5.77                            | 0.94-5.77                            | 0.94-5.77                            | 0.94-5.77                            |
| $\chi^2$                   | 1.22                                 | 1.34                                 | 1.35                                 | 1.27                                 |
| <i>R<sub>p</sub></i> (%)   | 7.68                                 | 9.62                                 | 10.95                                | 8.62                                 |
| <i>R<sub>wp</sub></i> (%)  | 10.33                                | 13.34                                | 14.98                                | 11.37                                |

*R<sub>p</sub>* = profile *R*-factor; *R<sub>wp</sub>* = weighted profile *R*-factor

**Table SI-4.** XPS elements positions and concentration of the area components for Ag, Se and O of the Ag<sub>2</sub>SeO<sub>4</sub> samples.

| Samples                              | Elements              | Ag 3d             |                   |                   |                   | Se 3p             |                   |                 | O 1s            |                  |                |
|--------------------------------------|-----------------------|-------------------|-------------------|-------------------|-------------------|-------------------|-------------------|-----------------|-----------------|------------------|----------------|
|                                      | oxidation states      | Ag <sup>+</sup>   |                   | Ag <sup>0</sup>   |                   | Se <sup>6+</sup>  |                   | Se <sup>0</sup> | O <sup>2-</sup> |                  |                |
|                                      | spin-orbit components | 3d <sub>5/2</sub> | 3d <sub>3/2</sub> | 3d <sub>5/2</sub> | 3d <sub>3/2</sub> | 3p <sub>3/2</sub> | 3p <sub>1/2</sub> | 3p              | Lattice oxygen  | Oxygen vacancies | Hydroxyl group |
| Ag <sub>2</sub> SeO <sub>4</sub> -SC | Position (eV)         | 367.3             | 373.3             | 368.1             | 374.1             | 165.6             | 171.3             | -               | 530.8           | 532.3            | 533.8          |
|                                      | Conc. (%)             | 29.64             | 28.65             | 21.21             | 20.50             | 51.02             | 48.98             | -               | 47.03           | 45.88            | 7.09           |
| Ag <sub>2</sub> SeO <sub>4</sub> -UP | Position (eV)         | 367.3             | 373.3             | 368.2             | 374.2             | 165.6             | 171.3             | -               | 530.8           | 532.3            | 533.8          |
|                                      | Conc. (%)             | 33.95             | 32.81             | 16.90             | 16.34             | 51.02             | 48.98             | -               | 55.60           | 38.30            | 6.10           |
| Ag <sub>2</sub> SeO <sub>4</sub> -CP | Position (eV)         | 367.3             | 373.3             | 368.1             | 374.1             | 165.6             | 171.3             | -               | 530.8           | 532.3            | 533.8          |
|                                      | Conc. (%)             | 29.61             | 28.62             | 21.24             | 20.53             | 51.02             | 48.98             | -               | 61.14           | 32.04            | 6.82           |
| Ag <sub>2</sub> SeO <sub>4</sub> -MH | Position (eV)         | 367.7             | 373.7             | 368.6             | 374.6             | 165.9             | 171.8             | 160.3           | 531.5           | 533.0            | 534.5          |
|                                      | Conc. (%)             | 34.12             | 32.98             | 16.73             | 16.17             | 48.40             | 46.47             | 5.12            | 43.52           | 52.94            | 3.54           |

**Table SI-5.** Surface energy ( $E_{surf}$ , Jm<sup>-2</sup>), contribution of the surface area to the total area ( $C_i$ , %), and the polyhedron energy ( $E_{poly}$ , Jm<sup>-2</sup>) for each of the crystal morphology of Ag<sub>2</sub>SeO<sub>4</sub> obtained by SC, UP, CP and MH method.

| <b>Morphologies</b> | <b>Ideal</b> |       | <b>A</b>   |       | <b>B</b>   |       | <b>C</b>   |       | <b>D</b>   |       | <b>E</b>   |       | <b>F</b>   |       | <b>G</b>   |       |
|---------------------|--------------|-------|------------|-------|------------|-------|------------|-------|------------|-------|------------|-------|------------|-------|------------|-------|
| <b>Surface</b>      | $E_{surf}$   | $C_i$ | $E_{surf}$ | $C_i$ | $E_{surf}$ | $C_i$ | $E_{surf}$ | $C_i$ | $E_{surf}$ | $C_i$ | $E_{surf}$ | $C_i$ | $E_{surf}$ | $C_i$ | $E_{surf}$ | $C_i$ |
| <b>(100)</b>        | 0.93         | -     | 0.93       | -     | 0.93       | -     | 0.93       | -     | 0.93       | -     | 0.40       | 21.71 | 0.93       | -     | 0.93       | -     |
| <b>(010)</b>        | 0.22         | 9.84  | 0.41       | -     | 0.80       | -     | 0.80       | -     | 0.80       | -     | 0.22       | 44.40 | 0.80       | -     | 0.80       | -     |
| <b>(001)</b>        | 0.22         | 14.29 | 0.46       | -     | 0.17       | 34.72 | 0.17       | 39.98 | 0.22       | 29.04 | 0.30       | 32.56 | 0.19       | 41.94 | 0.19       | 48.62 |
| <b>(101)</b>        | 0.28         | -     | 0.28       | -     | 0.28       | -     | 0.50       | -     | 0.50       | -     | 0.55       | -     | 0.28       | 28.99 | 0.52       | -     |
| <b>(011)</b>        | 0.23         | 12.84 | 0.32       | -     | 0.50       | -     | 0.50       | -     | 0.50       | -     | 0.80       | -     | 0.61       | 3.98  | 0.61       | 3.30  |
| <b>(110)</b>        | 0.34         | -     | 0.37       | -     | 0.34       | -     | 0.34       | -     | 0.34       | -     | 0.55       | -     | 0.50       | -     | 0.50       | -     |
| <b>(111)</b>        | 0.19         | 63.07 | 0.19       | 100.0 | 0.24       | 67.44 | 0.27       | 59.43 | 0.29       | 65.29 | 0.80       | -     | 0.44       | 17.14 | 0.44       | 41.47 |
| <b>(012)</b>        | 0.64         | -     | 0.64       | -     | 0.64       | -     | 0.64       | -     | 0.64       | -     | 0.64       | -     | 0.64       | -     | 0.64       | -     |
| <b>(021)</b>        | 0.54         | -     | 0.54       | -     | 0.54       | -     | 0.54       | -     | 0.54       | -     | 0.54       | -     | 0.80       | -     | 0.80       | -     |
| <b>(121)</b>        | 0.61         | -     | 0.61       | -     | 0.61       | -     | 0.40       | 0.06  | 0.35       | 5.67  | 0.61       | -     | 0.57       | 7.95  | 0.57       | 6.61  |
| $E_{poly}$          | 0.20         |       | 0.19       |       | 0.21       |       | 0.24       |       | 0.24       |       | 0.29       |       | 0.31       |       | 0.33       |       |
